# Supplementary material for: A pilot study combining noninvasive spinal neuromodulation and activity-based neurorehabilitation therapy in children with cerebral palsy
Source: PubMed Central journal article supplement (PMC9535012; doi:10.1038/s41467-022-33208-w), 2022-10-05
Supplement: 41467_2022_33208_MOESM2_ESM.pdf [file 41467_2022_33208_MOESM2_ESM.pdf]

## **Description of Additional Supplementary Files**

**Supplementary Video 1:** Supplementary of a representative child undergoing ABNT with SCiP and changes over time.
